# Supplementary material
Source: PubMed Central journal article supplement (PMC11539188)
Supplement: NIHMS2030389-supplement-Supplementary_Appendix.pdf [file NIHMS2030389-supplement-Supplementary_Appendix.pdf]

# Classifying Pre-Radiographic Osteoarthritis of the Knee Using Wearable Acoustics Sensing at the Point of Care

## Supplementary Material

Supplementary Table 1: Groupwise demographics of study participants

|              | Control | OA    | Pre-OA |
|--------------|---------|-------|--------|
| Subjects (N) | 13      | 11    | 8      |
| Age (Mean)   | 46.2    | 63.0  | 46.8   |
| BMI (Mean)   | 28.9    | 32.0  | 35.9   |
| Sex (M)      | 76.9%   | 63.6% | 75.0%  |

Supplementary Table 2: Total number of knees evaluated, by group, and number of knees included for each scripted maneuver. Data from flexion-extension and sit-to-stand maneuvers were excluded from the dataset if movement cycles exceeded 0.40 Hz to lessen variation introduced by large biomechanical forces present in vigorous movement. No pace threshold was used for walking. If a participant was unable to complete a scripted maneuver or an error which occurred during acoustic measurement was identified after the participant's visit, only their data for the corrupted maneuver was excluded from the dataset to preserve as much data as possible.

|                     | Control | OA | Pre-OA |
|---------------------|---------|----|--------|
| Knees               | 20      | 12 | 11     |
| - Flexion-Extension | 18      | 12 | 11     |
| - Sit-to-Stand      | 16      | 9  | 9      |
| - Walking           | 20      | 10 | 10     |

Supplementary Table 3: Mean  $\pm$  standard deviation of Knee Injury and Osteoarthritis Score (KOOS) subscales for pre-OA and OA participants. Subscale scoring ranges from 0 to 100, with 100 representing healthy, unimpeded function and 0 representing the most severe injury and interference with daily function.

| Group  | KOOS: Pain  | KOOS: Other Symptoms | KOOS: Function in Daily Living | KOOS: Function in Sport/Recreation | KOOS: Quality of Life | Presence of Crepitus |
|--------|-------------|----------------------|--------------------------------|------------------------------------|-----------------------|----------------------|
| OA     | 47 $\pm$ 10 | 45 $\pm$ 9           | 55 $\pm$ 12                    | 24 $\pm$ 7                         | 22 $\pm$ 16           | 100%                 |
| pre-OA | 58 $\pm$ 21 | 60 $\pm$ 18          | 64 $\pm$ 20                    | 42 $\pm$ 25                        | 34 $\pm$ 26           | 100%                 |

Supplementary Table 4: Median values +/- standard deviation for individual scripted maneuvers included in our optimized classification models by scripted maneuver and group. After finding non-normal feature distributions with the Shapiro-Wilk Test, Kruskal-Wallis Test was used to compare feature medians between groups. Dunn's test was used for post-hoc analyses with the Bonferroni correction. Several acoustic feature means were different between healthy and pre-OA and healthy and OA for flexion-extension and sit-to-stand. Only healthy vs OA had significantly different median values for walking measurements. Significant p-values are bolded. Pre-OA: early pre-radiographic osteoarthritis; OA: radiographic osteoarthritis; MFCC: Mel-Frequency Cepstrum Coefficient; RMS: root-mean-square value.

## Flexion-Extension

| Acoustic Feature        | Healthy Mean ± Std. Dev. | Pre-OA Mean ± Std. Dev. | OA Mean ± Std. Dev. | p: Kruskal-Wallis | p: Healthy - pre-OA | Healthy - pre-OA Effect Size | Healthy - pre-OA 95% CI | p: Healthy - OA | Healthy - OA Effect Size | Healthy - OA 95% CI | p: pre-OA - OA | pre-OA - OA Effect Size | pre-OA - OA 95% CI | Model  |
|-------------------------|--------------------------|-------------------------|---------------------|-------------------|---------------------|------------------------------|-------------------------|-----------------|--------------------------|---------------------|----------------|-------------------------|--------------------|--------|
| Spectral centroid       | 1331.228 ± 240.272       | 1066.751 ± 235.388      | 934.270 ± 169.968   | <b>0.000</b>      | <b>0.014</b>        | 1.0787                       | [0.921 23.17]           | <b>0.000</b>    | 1.8003                   | [6.77 28.4]         | 0.417          | 0.6321                  | [-6.71 17.81]      | Pre-OA |
| Spectral entropy        | 0.689 ± 0.047            | 0.648 ± 0.054           | 0.605 ± 0.038       | <b>0.000</b>      | 0.045               | 0.8129                       | [-1.05 21.19]           | <b>0.000</b>    | 1.8849                   | [8.03 29.68]        | 0.129          | 0.8896                  | [-3.47 21.04]      | Pre-OA |
| Spectral Roll-Off Point | 3882.395 ± 456.435       | 3239.930 ± 744.224      | 3241 ± 520.968      | <b>0.001</b>      | <b>0.005</b>        | 1.0853                       | [8.87 39.73]            | <b>0.002</b>    | 1.2934                   | [13.33 43.39]       | 1.000          | -0.0018                 | [-12.76 20.89]     | Pre-OA |
| MFCC 1                  | 2.842 ± 0.230            | 3.200 ± 0.371           | 3.179 ± 0.234       | <b>0.001</b>      | <b>0.005</b>        | -1.2058                      | [-24.86 -2.61]          | <b>0.001</b>    | -1.4174                  | [-25.78 -4.12]      | 1.000          | 0.0657                  | [-13.47 11.04]     | Pre-OA |
| MFCC 2                  | -1.422 ± 0.141           | -1.356 ± 0.181          | -1.152 ± 0.131      | <b>0.000</b>      | 0.499               | -0.4157                      | [-15.6 6.62]            | <b>0.000</b>    | -1.9273                  | [-28.34 -6.69]      | <b>0.017</b>   | -1.2623                 | [-25.27 -0.75]     | OA     |
| MFCC 6                  | -1.064 ± 0.073           | -0.992 ± 0.072          | -0.943 ± 0.053      | <b>0.000</b>      | 0.045               | -0.959                       | [-21.19 1.05]           | <b>0.000</b>    | -1.7873                  | [-28.40 -6.75]      | 0.214          | -0.7614                 | [-19.76 4.75]      | OA     |
| MFCC 8                  | -0.704 ± 0.042           | -0.644 ± 0.045          | -0.616 ± 0.051      | <b>0.000</b>      | <b>0.004</b>        | -1.3456                      | [-25.12 -2.86]          | <b>0.000</b>    | -1.8788                  | [-29.96 -8.30]      | 0.474          | -0.5693                 | [-17.39 7.12]      | OA     |
| Band Power 825-870 Hz   | 0.045 ± 0.013            | 0.043 ± 0.011           | 0.031 ± 0.008       | <b>0.005</b>      | 0.983               | 0.1898                       | [-9.05 13.20]           | <b>0.004</b>    | 1.1542                   | [2.64 24.31]        | 0.039          | 1.1436                  | [-0.85 23.66]      | OA     |

## Sit-to-Stand

| Acoustic Feature      | Healthy Mean ± Std. Dev. | Pre-OA Mean ± Std. Dev. | OA Mean ± Std. Dev. | p: Kruskal-Wallis | p: Healthy - pre-OA | Healthy - pre-OA Effect Size | Healthy - pre-OA 95% CI | p: Healthy - OA | Healthy - OA Effect Size | Healthy - OA 95% CI | p: pre-OA - OA | pre-OA - OA Effect Size | pre-OA - OA 95% CI | Model  |
|-----------------------|--------------------------|-------------------------|---------------------|-------------------|---------------------|------------------------------|-------------------------|-----------------|--------------------------|---------------------|----------------|-------------------------|--------------------|--------|
| Spectral spread       | 1116.876 ± 121.713       | 991.377 ± 109.381       | 962.416 ± 146.501   | <b>0.005</b>      | <b>0.011</b>        | 1.0321                       | [1.24 21.11]            | <b>0.006</b>    | 1.1462                   | [2.03 21.89]        | 1.000          | 0.2133                  | [-10.46 12.01]     | Pre-OA |
| Spectral centroid     | 1263.179 ± 209.131       | 1069.432 ± 177.625      | 991.576 ± 169.689   | <b>0.005</b>      | 0.067               | 0.9419                       | [-1.59 18.26]           | <b>0.004</b>    | 1.336                    | [2.51 22.37]        | 0.572          | 0.4268                  | [-7.13 15.34]      | OA     |
| Spectral decrease     | 0.035 ± 0.004            | 0.039 ± 0.004           | 0.040 ± 0.004       | <b>0.009</b>      | 0.051               | -0.9749                      | [-18.73 1.13]           | <b>0.014</b>    | -1.2268                  | [-20.73 -0.86]      | 1.000          | -0.282                  | [-13.23 9.24]      | OA     |
| Zero-crossing rate    | 0.066 ± 0.011            | 0.055 ± 0.008           | 0.049 ± 0.008       | <b>0.002</b>      | 0.083               | 0.9773                       | [-1.97 17.88]           | <b>0.001</b>    | 1.5536                   | [4.18 24.05]        | 0.283          | 0.6998                  | [-5.07 17.40]      | Both   |
| MFCC 5                | 1.186 ± 0.050            | 1.176 ± 0.050           | 1.201 ± 0.045       | 0.642             | 0.918               | 0.2013                       | [-7.82 12.03]           | 0.859           | -0.2989                  | [-12.27 7.59]       | 0.516          | -0.5035                 | [-15.68 6.79]      | OA     |
| MFCC 8                | -0.697 ± 0.054           | -0.676 ± 0.038          | -0.645 ± 0.039      | 0.051             | 0.527               | -0.4072                      | [-13.80 6.06]           | <b>0.017</b>    | -1.0178                  | [-20.46 -0.60]      | 0.233          | -0.777                  | [-17.90 4.57]      | Pre-OA |
| Band Power 380-400 Hz | 0.162 ± 0.017            | 0.161 ± 0.012           | 0.165 ± 0.019       | 0.885             | 1.000               | 0.1179                       | [-9.64 10.21]           | 0.961           | -0.14                    | [-11.87 7.99]       | 0.954          | -0.2666                 | [-13.46 9.01]      | Pre-OA |

## Walking

| Acoustic Feature        | Healthy Mean ± Std. Dev. | Pre-OA Mean ± Std. Dev. | OA Mean ± Std. Dev. | p: Kruskal-Wallis | p: Healthy - pre-OA | Healthy - pre-OA Effect Size | Healthy - pre-OA 95% CI | p: Healthy - OA | Healthy - OA Effect Size | Healthy - OA 95% CI | p: pre-OA - OA | pre-OA - OA Effect Size | pre-OA - OA 95% CI | Model  |
|-------------------------|--------------------------|-------------------------|---------------------|-------------------|---------------------|------------------------------|-------------------------|-----------------|--------------------------|---------------------|----------------|-------------------------|--------------------|--------|
| Spectral Centroid       | 309.298 ± 64.290         | 320.842 ± 40.524        | 269.003 ± 50.543    | 0.101             | 0.720               | -0.1939                      | [-14.03 7.63]           | 0.140           | 0.6502                   | [-3.23 18.43]       | 0.058          | 1.0837                  | [-1.71 23.31]      | Pre-OA |
| Spectral Entropy        | 0.440 ± 0.039            | 0.455 ± 0.025           | 0.417 ± 0.042       | 0.094             | 0.497               | -0.4196                      | [-15.23 6.43]           | 0.200           | 0.5688                   | [-4.03 17.63]       | 0.048          | 1.0625                  | [-1.31 23.71]      | Pre-OA |
| Spectral Roll-Off Point | 746.215 ± 109.418        | 761.874 ± 82.621        | 655.273 ± 139.117   | 0.104             | 1.000               | -0.1497                      | [-12.58 9.08]           | 0.098           | 0.7416                   | [-2.48 19.18]       | 0.080          | 0.8923                  | [-2.41 22.61]      | Both   |
| Spectral Skewness       | 1.884 ± 0.750            | 1.681 ± 0.445           | 2.494 ± 0.929       | 0.081             | 0.794               | 0.2949                       | [-7.98 13.68]           | 0.103           | -0.7343                  | [-19.08 2.58]       | 0.051          | -1.0699                 | [-23.61 1.41]      | OA     |
| Spectral Slope          | 0.000 ± 0.000            | 0.000 ± 0.000           | 0.000 ± 0.000       | 0.194             | 0.222               | -0.5289                      | [-17.38 4.28]           | 0.318           | -0.506                   | [-16.48 5.18]       | 1.000          | -0.0251                 | [-11.61 13.41]     | Pre-OA |
| Spectral Crest          | 74.394 ± 15.423          | 67.441 ± 8.702          | 80.421 ± 14.906     | 0.136             | 0.289               | 0.4945                       | [-4.93 16.73]           | 0.513           | -0.3845                  | [-15.13 6.53]       | 0.077          | -1.0185                 | [-22.71 2.31]      | Both   |
| RMS                     | 0.184 ± 0.076            | 0.146 ± 0.033           | 0.151 ± 0.057       | 0.176             | 0.183               | 0.5619                       | [-3.83 17.83]           | 0.404           | 0.4533                   | [-5.83 15.83]       | 1.000          | -0.1049                 | [-14.51 10.51]     | OA     |
| Log Energy              | 3.677 ± 1.062            | 3.314 ± 0.525           | 3.396 ± 0.937       | 0.181             | 0.146               | 0.3798                       | [-3.33 18.33]           | 0.548           | 0.2665                   | [-6.73 14.93]       | 0.773          | -0.1033                 | [-15.91 9.11]      | OA     |
| MFCC 0                  | -14.642 ± 1.539          | -15.122 ± 0.534         | -15.324 ± 1.394     | 0.176             | 0.204               | 0.356                        | [-4.08 17.58]           | 0.295           | 0.4441                   | [-4.98 16.68]       | 1.000          | 0.1835                  | [-13.41 11.61]     | OA     |
| MFCC 1                  | 6.592 ± 0.216            | 6.666 ± 0.122           | 6.450 ± 0.281       | 0.173             | 0.860               | -0.3789                      | [-13.38 8.28]           | 0.204           | 0.5792                   | [-4.08 17.58]       | 0.113          | 0.9553                  | [-3.21 21.81]      | OA     |
| MFCC 3                  | 0.206 ± 0.133            | 0.211 ± 0.115           | 0.330 ± 0.167       | 0.080             | 1.000               | -0.0435                      | [-11.08 10.58]          | 0.052           | -0.8393                  | [-20.38 1.28]       | 0.113          | -0.7932                 | [-21.81 3.21]      | Pre-OA |
| MFCC 4                  | -0.926 ± 0.142           | -0.936 ± 0.115          | -0.777 ± 0.188      | 0.047             | 1.000               | 0.0761                       | [-9.78 11.88]           | 0.040           | -0.9193                  | [-20.88 0.78]       | 0.051          | -0.9791                 | [-23.61 1.41]      | OA     |
| MFCC 9                  | 0.015 ± 0.038            | 0.016 ± 0.021           | 0.041 ± 0.047       | 0.116             | 1.000               | -0.0521                      | [-12.28 9.38]           | 0.065           | -0.6241                  | [-19.98 1.68]       | 0.211          | -0.6474                 | [-20.21 4.81]      | Pre-OA |
| MFCC 11                 | -0.306 ± 0.030           | -0.305 ± 0.024          | -0.274 ± 0.035      | 0.060             | 1.000               | -0.0411                      | [-11.63 10.03]          | 0.032           | -0.9722                  | [-21.23 0.43]       | 0.099          | -0.9803                 | [-22.11 2.91]      | OA     |
| Band Power 160-175 Hz   | 0.202 ± 0.053            | 0.191 ± 0.038           | 0.233 ± 0.040       | 0.118             | 0.906               | 0.2215                       | [-8.48 13.18]           | 0.130           | -0.6034                  | [-18.58 3.08]       | 0.080          | -1.0288                 | [-22.61 2.41]      | Pre-OA |
| Band Power 175-200 Hz   | 0.111 ± 0.031            | 0.115 ± 0.025           | 0.144 ± 0.035       | <b>0.013</b>      | 0.883               | -0.1461                      | [-13.28 8.38]           | <b>0.005</b>    | -1.021                   | [-24.18 -2.51]      | 0.056          | -0.9209                 | [-23.41 1.61]      | OA     |
| Band Power 620-680 Hz   | 0.045 ± 0.021            | 0.049 ± 0.013           | 0.030 ± 0.015       | 0.079             | 0.699               | -0.2053                      | [-14.13 7.53]           | 0.110           | 0.7418                   | [-2.73 18.93]       | 0.044          | 1.2427                  | [-1.11 23.91]      | Pre-OA |
| Band Power 850-920 Hz   | 0.029 ± 0.015            | 0.030 ± 0.013           | 0.018 ± 0.009       | 0.055             | 0.971               | -0.0481                      | [-11.78 9.88]           | 0.042           | 0.8235                   | [-0.88 20.78]       | 0.056          | 1.0217                  | [-1.61 23.41]      | Pre-OA |

Supplementary Table 5: Healthy Vs OA Classification Model Performance.

## Healthy vs. OA Classification Performance

| Movement Type     | Healthy Mean $\pm$ S.D. | Arthritic Mean $\pm$ S.D. | P value | Effect Size (Hedge's g) | CI 95%          | ROC AUC | Accuracy | Sensitivity | Specificity |
|-------------------|-------------------------|---------------------------|---------|-------------------------|-----------------|---------|----------|-------------|-------------|
| Flexion-Extension | 0.20 $\pm$ 0.22         | 0.83 $\pm$ 0.15           | <0.005  | 3.01                    | [0.49<br>0.77]  | 0.97    | 97%      | 100%        | 94%         |
| Sit-to-Stand      | 0.20 $\pm$ 0.29         | 0.78 $\pm$ 0.22           | <0.005  | 1.98                    | [0.35<br>0.79]  | 0.93    | 84%      | 89%         | 81%         |
| Walking           | 0.38 $\pm$ 0.20         | 0.60 $\pm$ 0.18           | 0.007   | 1.07                    | [0.06<br>0.38]  | 0.82    | 83%      | 80%         | 85%         |
| Composite         | 0.24 $\pm$ 0.22         | 0.82 $\pm$ 0.13           | <0.005  | 3.17                    | [0.45<br>0.71]  | 0.99    | 94%      | 100%        | 90%         |
| Age / BMI         | 0.42 $\pm$ 0.22         | 0.57 $\pm$ 0.21           | 0.06    | 0.69                    | [-0.33<br>0.01] | 0.72    | 59%      | 67%         | 55%         |

Supplementary Table 6: Healthy vs. All OA (pre-OA and OA) Classification Performance.

## Healthy vs. All OA Classification Performance

| Movement Type     | Healthy Mean $\pm$ S.D. | Arthritic Mean $\pm$ S.D. | P value | Effect Size (Hedge's g) | CI 95%          | ROC AUC | Accuracy | Sensitivity | Specificity |
|-------------------|-------------------------|---------------------------|---------|-------------------------|-----------------|---------|----------|-------------|-------------|
| Flexion-Extension | 0.34 $\pm$ 0.23         | 0.72 $\pm$ 0.19           | <0.005  | 1.81                    | [0.24<br>0.53]  | 0.88    | 80%      | 83%         | 78%         |
| Sit-to-Stand      | 0.35 $\pm$ 0.16         | 0.63 $\pm$ 0.15           | <0.005  | 1.81                    | [0.16<br>0.39]  | 0.91    | 80%      | 78%         | 81%         |
| Walking           | 0.46 $\pm$ 0.15         | 0.55 $\pm$ 0.13           | 0.07    | 0.64                    | [-0.01<br>0.17] | 0.70    | 75%      | 80%         | 70%         |
| Composite         | 0.40 $\pm$ 0.17         | 0.68 $\pm$ 0.15           | <0.005  | 1.75                    | [0.17<br>0.38]  | 0.89    | 84%      | 96%         | 70%         |
| Age / BMI         | 0.41 $\pm$ 0.23         | 0.59 $\pm$ 0.21           | 0.008   | 0.82                    | [0.05<br>0.33]  | 0.72    | 72%      | 71%         | 71%         |

Supplementary Table 7: Multiclass Classification Performance.

## Healthy, Pre-OA, and OA Multiclass Classification Performance

| Movement Type                  | Accuracy | Balanced Accuracy | Sensitivity | Specificity | Healthy Accuracy | Pre-OA Accuracy | OA Accuracy |
|--------------------------------|----------|-------------------|-------------|-------------|------------------|-----------------|-------------|
| Flexion-Extension              | 68%      | 67%               | 67%         | 84%         | 72%              | 55%             | 75%         |
| Sit-to-Stand                   | 62%      | 58%               | 58%         | 81%         | 75%              | 44%             | 56%         |
| Walking                        | 60%      | 60%               | 60%         | 79%         | 60%              | 60%             | 60%         |
| Composite                      | 71%      | 72%               | 71%         | 86%         | 75%              | 55%             | 83%         |
| Composite with Pain & Crepitus | 70%      | 69%               | 68%         | 85%         | 75%              | 55%             | 75%         |
| Age / BMI                      | 56%      | 56%               | 56%         | 78%         | 55%              | 72%             | 41%         |

Supplementary Table 8: Averaged-rater intra-class correlation coefficients averaged across microphones for all acoustic features investigated in this study. 10 knees from five participants of varying arthritic severity were recruited, and KAE's were measured four times across two measurement days from each participant. Average-rater ICC values from both inter-session and intra-session comparisons were very high for all scripted maneuvers (0.971 +/- 0.08).

| Acoustic Feature        | Flexion/Extension<br>Inter-Session | Flexion/Extension<br>Intra-Session | Sit to Stand<br>Inter-Session | Sit to Stand<br>Intra-<br>Session | Walking<br>Inter-Session | Walking<br>Intra-<br>Session |
|-------------------------|------------------------------------|------------------------------------|-------------------------------|-----------------------------------|--------------------------|------------------------------|
| Spectral Spread         | 0.995                              | 1.000                              | 0.994                         | 1.000                             | 0.981                    | 1.000                        |
| Spectral Centroid       | 0.995                              | 1.000                              | 0.993                         | 1.000                             | 0.987                    | 0.999                        |
| Spectral Decrease       | 0.995                              | 1.000                              | 0.866                         | 1.000                             | 0.908                    | 0.997                        |
| Spectral Entropy        | 0.995                              | 1.000                              | 0.991                         | 1.000                             | 0.981                    | 0.995                        |
| Spectral Roll-Off Point | 0.995                              | 1.000                              | 0.994                         | 1.000                             | 0.984                    | 1.000                        |
| Spectral Skewness       | 0.993                              | 0.998                              | 0.989                         | 0.999                             | 0.956                    | 0.989                        |
| Spectral Slope          | 0.964                              | 1.000                              | 0.895                         | 1.000                             | 0.899                    | 1.000                        |
| Spectral Crest          | 0.994                              | 0.999                              | 0.986                         | 0.999                             | 0.974                    | 0.999                        |
| Zero-Crossing Rate      | 0.995                              | 0.999                              | 0.994                         | 0.999                             | 0.986                    | 1.000                        |
| RMS                     | 0.960                              | 0.969                              | 0.893                         | 0.890                             | 0.879                    | 0.913                        |
| Log Energy              | 0.967                              | 0.995                              | 0.911                         | 0.979                             | 0.866                    | 0.994                        |
| MFCC 0                  | 0.975                              | 0.997                              | 0.923                         | 0.993                             | 0.891                    | 0.999                        |
| MFCC 1                  | 0.995                              | 1.000                              | 0.992                         | 1.000                             | 0.942                    | 1.000                        |
| MFCC 2                  | 0.993                              | 1.000                              | 0.986                         | 1.000                             | 0.859                    | 1.000                        |
| MFCC 3                  | 0.989                              | 1.000                              | 0.987                         | 1.000                             | 0.979                    | 0.990                        |
| MFCC 4                  | 0.992                              | 1.000                              | 0.986                         | 1.000                             | 0.983                    | 1.000                        |
| MFCC 5                  | 0.990                              | 1.000                              | 0.987                         | 1.000                             | 0.983                    | 1.000                        |
| MFCC 6                  | 0.988                              | 1.000                              | 0.987                         | 1.000                             | 0.960                    | 0.995                        |
| MFCC 8                  | 0.986                              | 1.000                              | 0.981                         | 1.000                             | 0.924                    | 0.994                        |
| MFCC 9                  | 0.980                              | 0.987                              | 0.968                         | 0.978                             | 0.946                    | 0.998                        |
| MFCC 11                 | 0.959                              | 0.999                              | 0.927                         | 0.999                             | 0.964                    | 1.000                        |
| Band Power 380-400 Hz   | 0.974                              | 0.999                              | 0.945                         | 0.997                             | 0.966                    | 0.998                        |
| Band Power 825-870 Hz   | 0.989                              | 0.999                              | 0.982                         | 0.999                             | 0.984                    | 0.999                        |
| Band Power 910-950 Hz   | 0.991                              | 0.999                              | 0.977                         | 0.999                             | 0.983                    | 0.999                        |

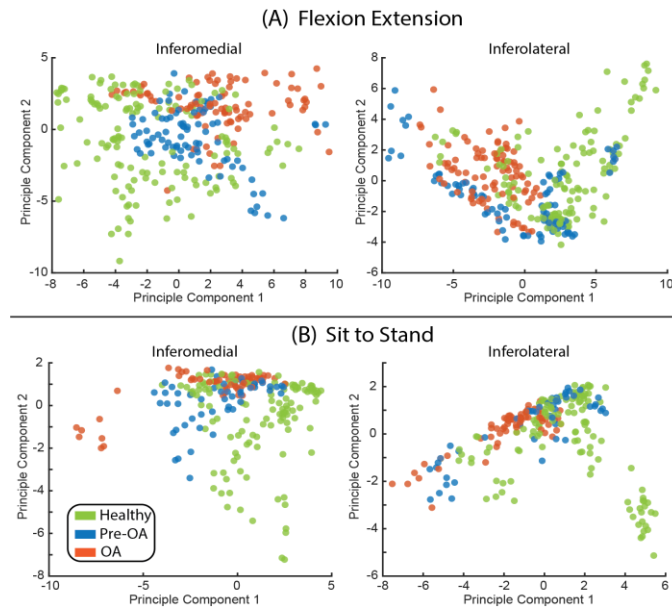

Supplementary Figure 1: Principal component analysis (PCA) of acoustic features from individual microphones for flexion-extension and sit-to-stand maneuvers. PCA was used to reduce the dimensionality of acoustic features to visualize data variability between movement cycles. Inferomedial and inferolateral microphones showed the most separation between clusters, with pre-OA grouping closer to OA than healthy. Pre-OA: early pre-radiographic osteoarthritis; OA: radiographic osteoarthritis.
